# Supplementary material for: HMGB1-triggered inflammation inhibition of notoginseng leaf triterpenes against cerebral ischemia and reperfusion injury via MAPK and NF-κB signaling pathways
Source: PubMed Central journal article supplement (PMC6843331; doi:10.3390/biom9100512), 2019-09-20
Supplement: biomolecules-09-00512-s001.pdf [file biomolecules-09-00512-s001.pdf]

## Supplementary materials

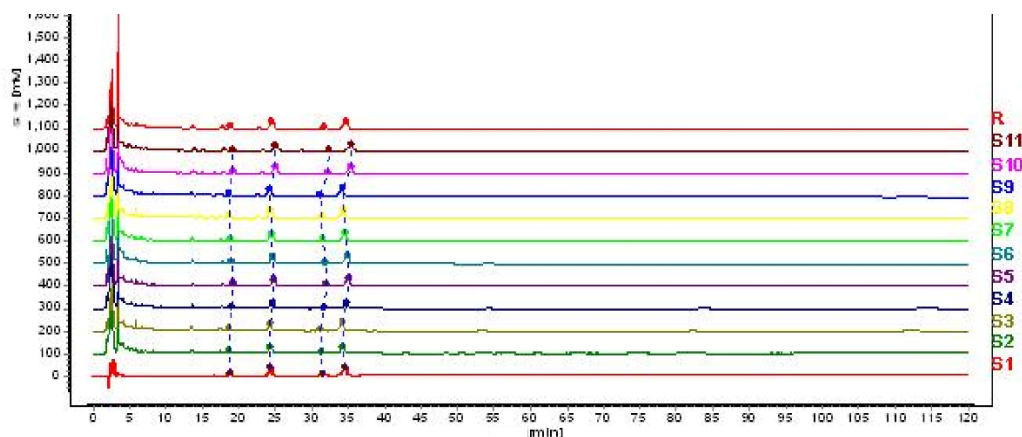

**Figure S1.** The chromatograms and the chemical fingerprinting of PNGL established by the high performance liquid chromatography (HPLC). The chemical fingerprinting from eleven batches of PNGL samples.

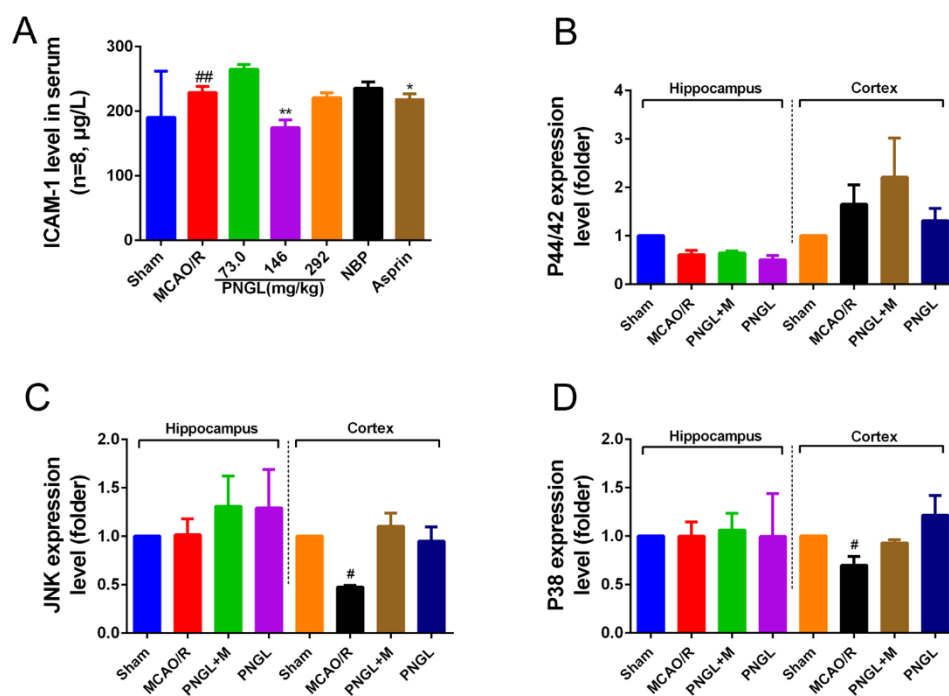

**Figure S2.** Effects of PNGL on the ICAM-1 concentration in serum, the JNK, P44/42, and P38 expression in MCAO/R rats. PNGL alleviates BBB disruption and inflammatory cytokines in MCAO/R rats. (A) The ICAM-1 concentration in serum. (B) (C) (D) The JNK, P44/42, and P38 expression (n = 3-4 in each group), measured at 632 nm using spectrophotometry. Mean values  $\pm$  SEM; \* p < 0.05, \*\* p < 0.01 versus MCAO/R group; # p < 0.05, ## p < 0.01, versus sham group.
